# Supplementary material for: Temperature-Dependent Effects of Eicosapentaenoic Acid (EPA) on Browning of Subcutaneous Adipose Tissue in UCP1 Knockout Male Mice
Source: MDPI journal article supplement (doi:10.3390/ijms24108708), 2023-05-13
Supplement: s1 [file s1]

# Temperature-Dependent Effects of Eicosapentaenoic Acid (EPA) on Browning of Subcutaneous Adipose Tissue in UCP1 Knockout Male Mice

**Table S1.** Effects of temperature (T), genotype (G), diet (D) and interaction on fatty acid composition (%) of SAT in WT and KO mice reported by three-way ANOVA at ambient (A) and thermoneutral (T) temperatures; groups represented with different letter indicate significant difference reported by three-way ANOVA, n = 4.

|                                    | Temp | Group                    |                          |                          |                          |          | T (22°C and 30°C) | G (WT and KO) | Three-way ANOVA |               |               |               |               |
|------------------------------------|------|--------------------------|--------------------------|--------------------------|--------------------------|----------|-------------------|---------------|-----------------|---------------|---------------|---------------|---------------|
|                                    |      | WT HF                    | WT EPA                   | KO HF                    | KO EPA                   | p        |                   |               | D (HFD and EPA) | T×G           | T×D           | G×D           | T×G×D         |
| <b>Palmitic acid</b> 16:0          | A    | 17.16                    | 18.72                    | 18.06                    | 18.28                    | <b>p</b> | <0.0001           | <b>0.0179</b> | <b>0.001</b>    | 0.1336        | 0.9131        | 0.1706        | 0.154         |
|                                    | T    | 19.19                    | 20.02                    | 20.12                    | 20.98                    | <b>F</b> | 75.87             | 6.466         | 14.01           | 2.411         | 0.01217       | 1.996         | 2.167         |
| <b>Palmitoleic acid</b> 16:1 (n-7) | A    | 1.08                     | 0.93                     | 1.19                     | 1.16                     | <b>p</b> | <b>0.0017</b>     | <b>0.001</b>  | <b>0.0088</b>   | 0.2274        | 0.8527        | <b>0.0499</b> | 0.8237        |
|                                    | T    | 1.02                     | 0.84                     | 1.03                     | 1.00                     | <b>F</b> | 12.45             | 14.09         | 8.141           | 1.535         | 0.03524       | 4.264         | 0.05074       |
| <b>Linoleic acid</b> 18:2 (n-6)    | A    | 21.59                    | 20.97                    | 19.65                    | 19.71                    | <b>p</b> | 0.7638            | <0.0001       | 0.3283          | 0.5309        | 0.0613        | 0.9677        | 0.2799        |
|                                    | T    | 20.42                    | 21.59                    | 19.50                    | 20.05                    | <b>F</b> | 0.09234           | 23.83         | 0.9957          | 0.4042        | 3.855         | 0.001677      | 1.222         |
| <b>α-linolenic acid</b> 18:3 (n-3) | A    | 0.99                     | 1.07                     | 0.86                     | 0.85                     | <b>p</b> | <0.0001           | 0.7276        | 0.0529          | <0.0001       | 0.3188        | 0.8768        | 0.1956        |
|                                    | T    | 1.15                     | 1.21                     | 1.27                     | 1.40                     | <b>F</b> | 96.6              | 0.1242        | 4.146           | 27.12         | 1.037         | 0.02453       | 1.773         |
| <b>EPA</b> 20:5 (n-3)              | A    | <b>0.00</b> <sup>a</sup> | <b>2.97</b> <sup>b</sup> | <b>0.00</b> <sup>a</sup> | <b>2.04</b> <sup>b</sup> | <b>p</b> | <b>0.0153</b>     | 0.3089        | <0.0001         | <b>0.0002</b> | <b>0.0153</b> | 0.3089        | <b>0.0002</b> |
|                                    | T    | <b>0.00</b> <sup>a</sup> | <b>2.49</b> <sup>b</sup> | <b>0.00</b> <sup>a</sup> | <b>4.00</b> <sup>b</sup> | <b>F</b> | 6.825             | 1.081         | 417.7           | 18.88         | 6.825         | 1.081         | 18.88         |
| <b>DHA</b> 22:5 (n-3)              | A    | <b>0.10</b> <sup>a</sup> | <b>0.66</b> <sup>b</sup> | <b>0.13</b> <sup>a</sup> | <b>0.70</b> <sup>b</sup> | <b>p</b> | 0.2891            | <b>0.0354</b> | <0.0001         | 0.1954        | 0.8782        | 0.3315        | 0.4112        |
|                                    | T    | <b>0.12</b> <sup>a</sup> | <b>0.62</b> <sup>b</sup> | <b>0.19</b> <sup>a</sup> | <b>0.84</b> <sup>b</sup> | <b>F</b> | 1.175             | 4.973         | 196             | 1.774         | 0.02398       | 0.9824        | 0.6994        |

WT, wild-type; KO, UCP1 knockout; HFD, high fat diet; EPA, HFD supplemented with EPA.

We performed an analysis of fatty acid profile in subcutaneous adipose tissue (SAT) from all groups (Table S1). EPA was only found in the SAT of EPA fed mice (WT and KO) at both temperatures, and the three-way ANOVA revealed a significant effect for diet ( $p < 0.0001$ ) and interaction between diet, temperature, and genotype ( $p = 0.002$ ). Compared to the HFD, EPA increased the percentage of DHA in WT and KO mice by 6.5 and 5.3-folds at ambient temperature and by 5.0 and 4.9-folds at thermoneutrality, respectively. In addition, the percentage of DHA in UCP1 KO mice was slightly higher than it in WT mice at both temperatures. The three-way ANOVA revealed a significant main effect for diet ( $p < 0.0001$ ) and genotype ( $p = 0.0354$ ) on DHA percentage in SAT. Both WT and KO mice at thermoneutrality have significantly higher percentage of α-linolenic acid, another omega-3 fatty acid, in SAT compared to mice at ambient temperature. In addition, the three-way ANOVA revealed a significant main effect on temperature, genotype, or diet for both palmitic and palmitoleic acid. Compared to the ambient temperature, both WT and KO mice in thermoneutrality have significantly higher percentage of palmitic acid, but lower percentage of palmitoleic acid, in the SAT. Interestingly, compared to the HF, both WT and KO mice fed with EPA have higher percentage of palmitic acid, but lower percentage of palmitoleic acid, in the SAT at both temperatures. No significant differences were observed in the percentages of linoleic acid among the groups.

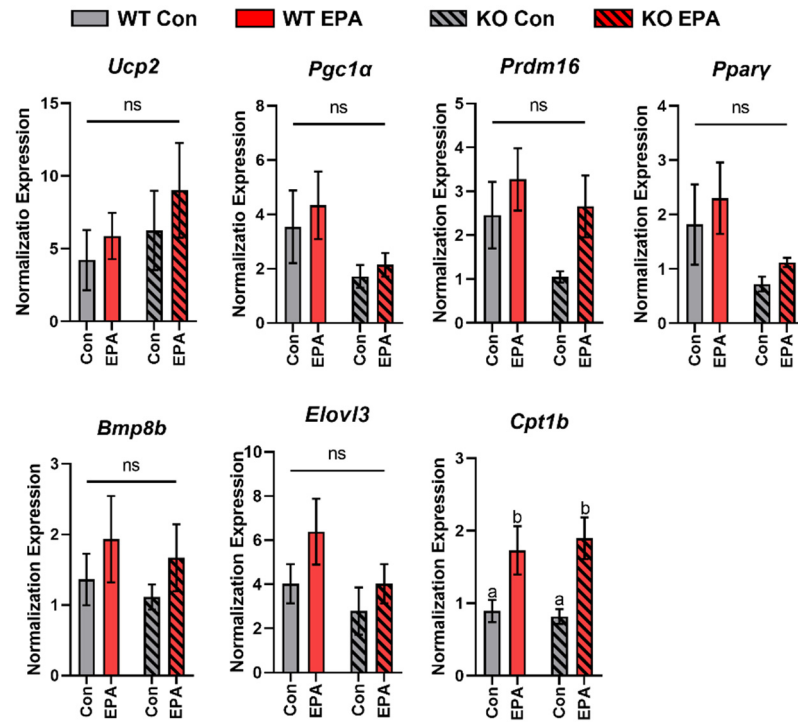

**Figure S1.** mRNA expression of thermogenic genes regulated by EPA in primary subcutaneous adipocytes isolated from WT and UCP1 KO mice. Data were expressed as mean  $\pm$  SEM and analyzed by two-way ANOVA with different letters indicating significant difference,  $p < 0.05$ , three independent studies.

**Table S2.** Effects of genotype, treatment and interaction of G and T on gene expression and respiration in differentiated primary adipocytes reported by two-way ANOVA.

| Variable      | <i>p</i> -Value         |                            |                             |
|---------------|-------------------------|----------------------------|-----------------------------|
|               | Genotype<br>(WT and KO) | Treatment<br>(Con and EPA) | Genotype $\times$ Treatment |
| <i>Ucp2</i>   | 0.3188                  | 0.3935                     | 0.8287                      |
| <i>Pgc1α</i>  | <b>0.0497</b>           | 0.5342                     | 0.8506                      |
| <i>Prdm16</i> | 0.1396                  | 0.0782                     | 0.577                       |
| <i>Pparγ</i>  | <b>0.0342</b>           | 0.3887                     | 0.9305                      |
| <i>Bmp8b</i>  | 0.5654                  | 0.2109                     | 0.9865                      |
| <i>Elovl3</i> | 0.1211                  | 0.1211                     | 0.622                       |
| <i>Cpt1b</i>  | 0.8491                  | <b>0.0007</b>              | 0.6171                      |

WT, wild-type; KO, UCP1 knockout; Con, saline control; EPA, 100  $\mu$ M EPA in cell culture medium.

We differentiated SAT-derived primary adipocytes isolated from WT and UCP KO male mice to validate the role of UCP1 in thermogenesis and determine how EPA regulates the beige adipocytes programming in absence of UCP1. Genes involved in thermogenesis (*Ucp2*), browning regulation (*Pgc1α*, *Prdm16*, *Pparγ* and *Bmp8b*) and lipid metabolism (*Elovl3* and *Cpt1b*) were increased by EPA in both genotypes (Figure S1), but no significant difference were observed (Table S2).

**Table S3.** Diet composition.

|                                       |        |          | D08112003 |          |
|---------------------------------------|--------|----------|-----------|----------|
| HF-EPA                                |        |          | HF        |          |
|                                       | gm     | kcal (%) | gm        | kcal (%) |
| Protein                               | 24     | 20       | 24        | 20       |
| Carbohydrate                          | 41     | 35       | 41        | 35       |
| Fat                                   | 24     | 45       | 24        | 45       |
| Total                                 |        | 100      |           | 100      |
|                                       | gm     | kcal     | gm        | kcal     |
| Casein                                | 200    | 800      | 200       | 800      |
| L-Cystine                             | 3      | 12       | 3         | 12       |
| Corn Starch                           | 72.8   | 291      | 72.8      | 291      |
| Maltodextrin 10                       | 100    | 400      | 100       | 400      |
| Sucrose                               | 172.8  | 691      | 172.8     | 691      |
| Cellulose                             | 50     | 0        | 50        | 0        |
| Soybean Oil                           | 25     | 225      | 25        | 225      |
| Lard                                  | 139.5  | 1256     | 177.5     | 1598     |
| AlaskOmega EE (820 mg EPA/g)          | 38     | 32       | 0         | 0        |
| Mineral Mix S10026                    | 10     | 0        | 10        | 0        |
| Di Calcium Phosphate                  | 13     | 0        | 13        | 0        |
| Calcium Carbonate                     | 5.5    | 0        | 5.5       | 0        |
| Potassium Citrate, 1 H <sub>2</sub> O | 16.5   | 0        | 16.5      | 0        |
| Vitamin Mix V10001                    | 10     | 40       | 10        | 40       |
| Choline Bitartrate                    | 2      | 0        | 2         | 0        |
| Vitmain E Acetate, 50% (500IU/gm)     | 0.13   | 0        | 0.13      | 0        |
| FD&C Yellow Dye #5                    | 0.05   | 0        | 0         | 0        |
| FD&C Red Dye #40                      | 0      | 0        | 0.025     | 0        |
| FD&C Blue Dye #1                      | 0      | 0        | 0.025     | 0        |
| Total                                 | 858.27 | 4057     | 858.28    | 4057     |
| EPA content in the diet (g/kg diet)   | 36     |          | 0         |          |

**Table S4.** Primer sequences.

| Gene           | Forward (5'-3')        | Reverse (5'-3')          |
|----------------|------------------------|--------------------------|
| <i>Ucp1</i>    | GAGGTGTGGCAGTGTTCATT   | CTGTGGTGGCTATAACTCTGTAAG |
| <i>Pgc1α</i>   | GAGCGAGTGAGCGTGAGA     | GTGGCAGTGGAACATCAACA     |
| <i>Cidea</i>   | TCCTCGGCTGTCTCAATGT    | GATGGCTGCTCTTCTGTATCG    |
| <i>Bmp8b</i>   | GCTCAGGCTCTTCAGTATC    | ACAGGCTATGGAGTGCTA       |
| <i>Dio2</i>    | TGCGCTGTGTCTGGAACAG    | CTGGAATTGGGAGCATCTTCA    |
| <i>Pdk4</i>    | TGTGATGTGCTAGCAGTAGT   | TGGTGAAGGTGTGAAGGA       |
| <i>Cox7a1</i>  | GTGGCAGAGAAGCAGAAG     | CCAAGCAGTATAAGCAGTAGG    |
| <i>Elovl3</i>  | ACGGAACACTTCTTCTGGTCTT | CCTACTCTCATTGGCTCTTGGA   |
| <i>Gpd1</i>    | CGGAGACAAGCGGAAGGA     | CCAGAGGACAGCAAGGAAGT     |
| <i>Cpt1b</i>   | CCACAGACAGAGGCACTT     | CAGGAGACGGACACAGATAG     |
| <i>Serca2b</i> | ACCTTTGCCGCTCATTTTCCAG | AGGCTGCACACACTCTTTACC    |
| <i>Pm20d1</i>  | AAAGAGGCGCTGAAAGGTG    | GTGGCTGAAAGACACTGTGG     |
| <i>Trpv2</i>   | TTGACCGTGACCGACTCTT    | GGCAGGATACAGGCATTGAC     |
